# Supplementary material
Source: MDPI journal article supplement (https://www.mdpi.com/2313-0105/9/10/518)
Supplement: s1 [file s1]

## Supplementary Information

Table S1. Cell Properties Comparison

| Property                             | Coin Cell | Single-Layer Pouch | Multi-layer Pouch |
|--------------------------------------|-----------|--------------------|-------------------|
| Cathodes / mm                        | φ14.8     | 68 x 48            | 68 x 48           |
| Cathodes / cm <sup>2</sup>           | 1.72      | 33.2               | 600               |
| Capacity / A hr                      | 0.0045    | 0.080              | 1.40              |
| Electrolyte / g                      | 0.10      | 0.65               | 7.0               |
| Electrolyte / g (A hr) <sup>-1</sup> | 22.2      | 8.1                | 5.0               |

Table S2. Averaged cell results

| Coating | Cell Type | Coating / gsm | Porosity / % | 0.2C / mA hr g <sup>-1</sup> | FCL / % | 5C / 0.2C / % | Min ASId / S cm <sup>-2</sup> |
|---------|-----------|---------------|--------------|------------------------------|---------|---------------|-------------------------------|
| MIX18   | Coin      | 170.4         | 38.0         | 152.5                        | 1.8     | 61.2          | 0.051                         |
| MIX19D1 | Coin      | 165.2         | 40.6         | 152.5                        | 1.7     | 62.2          | 0.052                         |
| MIX20D2 | Coin      | 169.5         | 38.0         | 152.5                        | 1.8     | 59.6          | 0.048                         |
| MIX20D3 | Coin      | 170.6         | 36.8         | 153.3                        | 1.8     | 61.5          | 0.052                         |
| MIX20D2 | Coin      | 170.4         | 37.0         | 142.6                        | 10.3    | 45.3          | 0.042                         |
| MIX20D3 | Coin      | 170.7         | 37.3         | 141.8                        | 10.4    | 48.9          | 0.046                         |
| MIX20D2 | SLP       | 165.3         | 38.8         | 144.7                        | 8.2     | 48.1          | 0.051                         |
| MIX20D3 | SLP       | 163.8         | 40.1         | 144.3                        | 8.2     | 48.8          | 0.050                         |
| MIX20D3 | MLP       | 164.1         | N / A        | 145.3                        | 8.4     | 63.8          | 0.039                         |

TableS3. Summary of resistance measurements

| Mix I.D.  | Drying Conditions | Coating Thickness / um |        | Total Through-Plane / Ω cm <sup>2</sup> |        |
|-----------|-------------------|------------------------|--------|-----------------------------------------|--------|
|           |                   | Uncalendered           | Cal485 | Uncalendered                            | Cal485 |
| MIX18     | Lab               | 142                    | 80     | 1.30                                    | 0.13   |
| MIX19     | D1                | 128                    | 88     | 0.76                                    | 0.07   |
| MIX20     | D2                | 132                    | 85     | 2.45                                    | 0.12   |
| MIX20     | D3                | 133                    | 76     | 2.44                                    | 0.10   |
| MIX20 (A) | D3                | 139                    | 77     | 2.69                                    | 0.27   |
| MIX20 (B) | D3                | 139                    | 77     | 2.54                                    | 0.28   |

NB. Coating thicknesses of double-sided coating assumed to be symmetrical (cal. and uncal.).

Table S4. Averaged resistivity measurements (uncalendered)

| Mix I.D.  | Drying Conditions | Volumetric Resistivity / $\Omega$ cm |      | Interface Resistance / $\Omega$ cm <sup>2</sup> |       |
|-----------|-------------------|--------------------------------------|------|-------------------------------------------------|-------|
|           |                   | Mean                                 | S.D. | Mean                                            | S.D.  |
| MIX18     | Lab               | 5.36                                 | 0.20 | 1.22                                            | 0.114 |
| MIX19     | D1                | 4.97                                 | 0.04 | 0.70                                            | 0.037 |
| MIX20     | D2                | 7.71                                 | 0.10 | 2.35                                            | 0.295 |
| MIX20     | D3                | 7.03                                 | 0.09 | 2.34                                            | 0.270 |
| MIX20 (A) | D3                | 6.90                                 | 0.31 | 2.59                                            | 0.208 |
| MIX20 (B) | D3                | 7.13                                 | 0.19 | 2.44                                            | 0.228 |

Table S5. Averaged resistivity measurements (calendered, 500  $\mu$ m)

| Mix I.D. | Drying Conditions | Volumetric Resistivity / $\Omega$ cm |      | Interface Resistance / $\Omega$ cm <sup>2</sup> |       |
|----------|-------------------|--------------------------------------|------|-------------------------------------------------|-------|
|          |                   | Mean                                 | S.D. | Mean                                            | S.D.  |
| MIX19    | D1                | 3.53                                 | 0.06 | 0.06                                            | 0.002 |
| MIX20    | D2                | 6.01                                 | 0.10 | 0.17                                            | 0.013 |
| MIX20    | D3                | 5.80                                 | 0.13 | 0.13                                            | 0.013 |

Table S6. Averaged resistivity measurements (calendered, 495  $\mu$ m)

| Mix I.D. | Drying Conditions | Volumetric Resistivity / $\Omega$ cm |      | Interface Resistance / $\Omega$ cm <sup>2</sup> |       |
|----------|-------------------|--------------------------------------|------|-------------------------------------------------|-------|
|          |                   | Mean                                 | S.D. | Mean                                            | S.D.  |
| MIX19    | D1                | 3.58                                 | 0.11 | 0.04                                            | 0.003 |
| MIX20    | D2                | 5.62                                 | 0.23 | 0.14                                            | 0.016 |
| MIX20    | D3                | 5.48                                 | 0.13 | 0.11                                            | 0.009 |

Table S7. Averaged resistivity measurements (calendered, 485  $\mu$ m or “Zero Gap”)

| Mix I.D.  | Drying Conditions | Volumetric Resistivity / $\Omega$ cm |      | Interface Resistance / $\Omega$ cm <sup>2</sup> |       |
|-----------|-------------------|--------------------------------------|------|-------------------------------------------------|-------|
|           |                   | Mean                                 | S.D. | Mean                                            | S.D.  |
| MIX18     | Lab               | 3.90                                 | 0.34 | 0.10                                            | 0.013 |
| MIX19     | D1                | 3.84                                 | 0.21 | 0.03                                            | 0.002 |
| MIX20     | D2                | 4.80                                 | 0.10 | 0.08                                            | 0.006 |
| MIX20     | D3                | 5.01                                 | 0.11 | 0.07                                            | 0.003 |
| MIX20 (A) | D3                | 4.98                                 | 0.10 | 0.23                                            | 0.024 |
| MIX20 (B) | D3                | 4.26                                 | 0.10 | 0.25                                            | 0.031 |

Table S8. Model input parameters

| Code | Feature     | Actual |       | Coded  |       | Mix18  |        |
|------|-------------|--------|-------|--------|-------|--------|--------|
|      |             | Min.   | Max.  | Low    | High  | Actual | Coded  |
| A    | LFP         | 94.03  | 98.50 | 0.00   | 1     | 97.03  | 0.671  |
| B    | KS6L        | 0.70   | 2.80  | 0.00   | 0.480 | 0.87   | 0.038  |
| C    | SWCNT       | 0.05   | 0.20  | 0.00   | 0.034 | 0.16   | 0.025  |
| D    | PVDF        | 0.75   | 3.00  | 0.00   | 0.503 | 1.94   | 0.266  |
| E    | Coat weight | 152.0  | 188.5 | - 1.00 | 1.00  | 170    | -0.014 |
| F    | Porosity    | 36.5   | 43.5  | - 1.00 | 1.00  | 38.2   | -0.514 |

Table S9. Output ranges and desirability scores

| Parameter                |                                         | Minimum | Maximum |
|--------------------------|-----------------------------------------|---------|---------|
| 5 C discharge capacity   | / mA hr g <sub>coat</sub> <sup>-1</sup> | 0       | 100     |
| Adhesion                 | / kPa                                   | 150     | 600     |
| Through plane resistance | / S cm <sup>-2</sup>                    | 0       | 6       |
| Area specific impedance  | / S cm <sup>-2</sup>                    | 0.02    | 0.06    |

Table S10. Multi-linear regression coefficients

| Coeff.         | 5C<br>/ mA hr g <sub>coat</sub> <sup>-1</sup> | Adhesion<br>/ kPa | Vol. conductivity<br>/ S cm <sup>-1</sup> | ASI (min)<br>/ Ω cm <sup>2</sup> |
|----------------|-----------------------------------------------|-------------------|-------------------------------------------|----------------------------------|
| A              | 12.4                                          | 149.9             | 0.41                                      | 69.3                             |
| B              | 82.9                                          | -54.0             | 1.10                                      | -40.3                            |
| C              | 2029.5                                        | 65.1              | -25.35                                    | -30168.3                         |
| D              | 21.4                                          | 988.2             | 0.91                                      | 98.8                             |
| A:B            | 108.5                                         |                   |                                           |                                  |
| A:C            |                                               |                   |                                           | 30814.3                          |
| A:D            |                                               |                   |                                           | -141.1                           |
| A:E            | -29.1                                         |                   |                                           | 37.7                             |
| A:F            | -32.8                                         |                   |                                           | 17.4                             |
| B:C            | -2974.3                                       |                   | 130.52                                    | 33054.2                          |
| B:D            |                                               |                   |                                           |                                  |
| B:E            |                                               |                   |                                           | -81.2                            |
| B:F            | 69.2                                          |                   |                                           |                                  |
| C:D            |                                               |                   | 256.76                                    | 28824.5                          |
| C:E            |                                               |                   |                                           |                                  |
| C:F            |                                               |                   |                                           | -863.3                           |
| D:E            |                                               |                   |                                           |                                  |
| D:F            | -103.7                                        |                   |                                           | 32.6                             |
| E:F            |                                               |                   |                                           |                                  |
| E <sup>2</sup> |                                               |                   |                                           | -24.2                            |
| F <sup>2</sup> |                                               |                   |                                           |                                  |

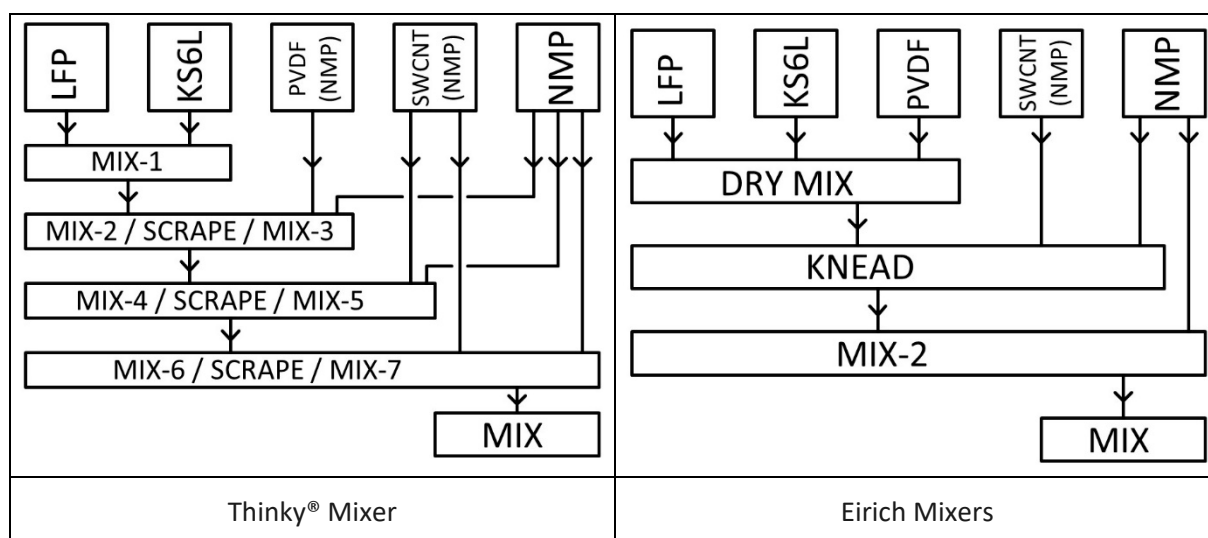

Figure S1. Mixing protocols in Thinky® and Eirich mixers

|                         |       |                     |        |                     |
|-------------------------|-------|---------------------|--------|---------------------|
| Thinky® mixing steps    | MIX-1 | 1300 rpm, 5 minutes | Others | 2000 rpm, 5 minutes |
| Thinky® solids contents | MIX-2 | 66.8 wt%            | MIX-4  | 57.5 wt%            |
| Eirich solids contents  | Knead | ~ 67 wt%            | MIX-2  | ~ 52 wt%            |

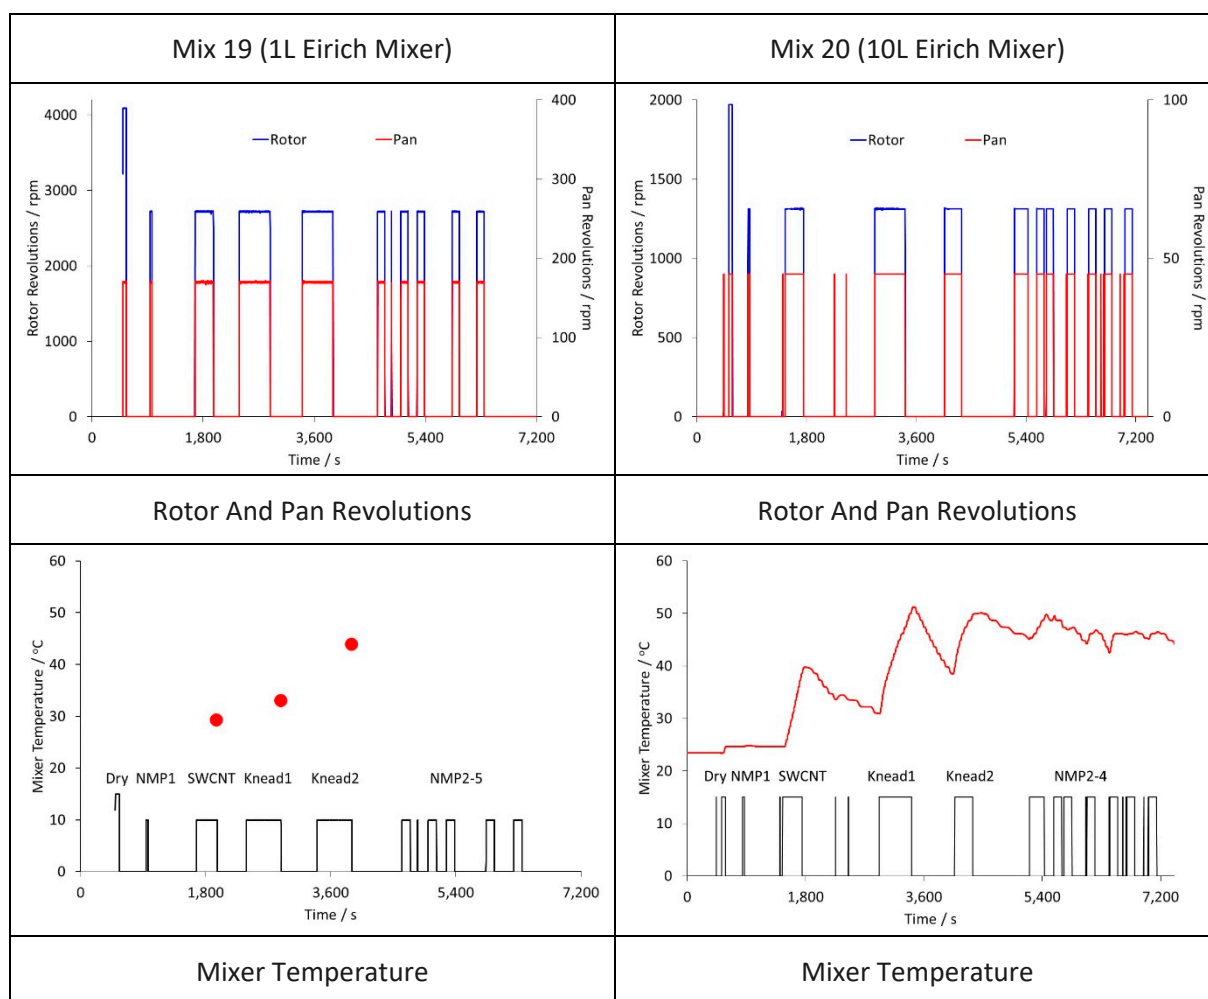

Figure S2. Data recorded during Eirich mixing processes

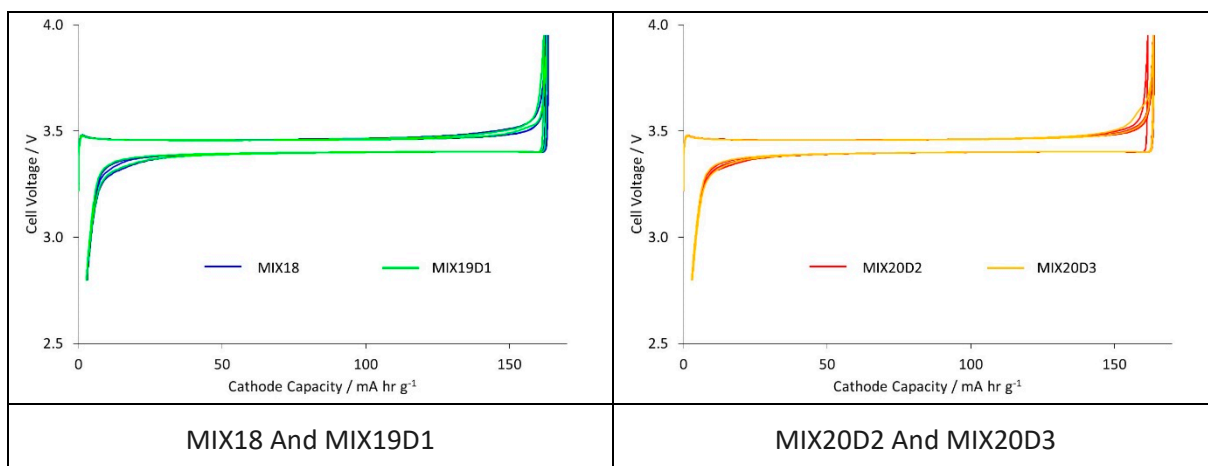

Figure S3. Half-cell coin cell voltages during formation cycle

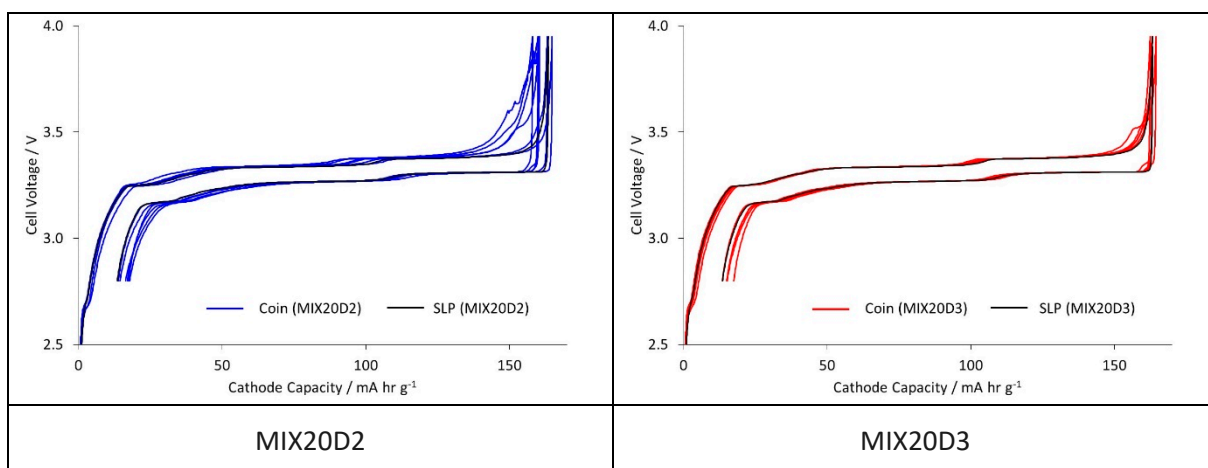

Figure S4. Full-cell coin cell voltages during formation cycle

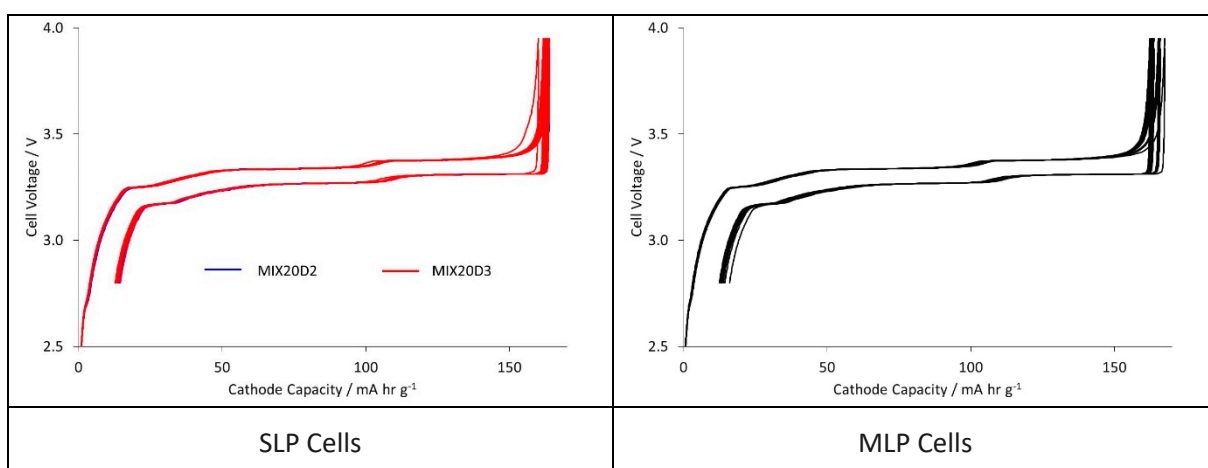

Figure S5. SLP and MLP cell voltages during formation cycle

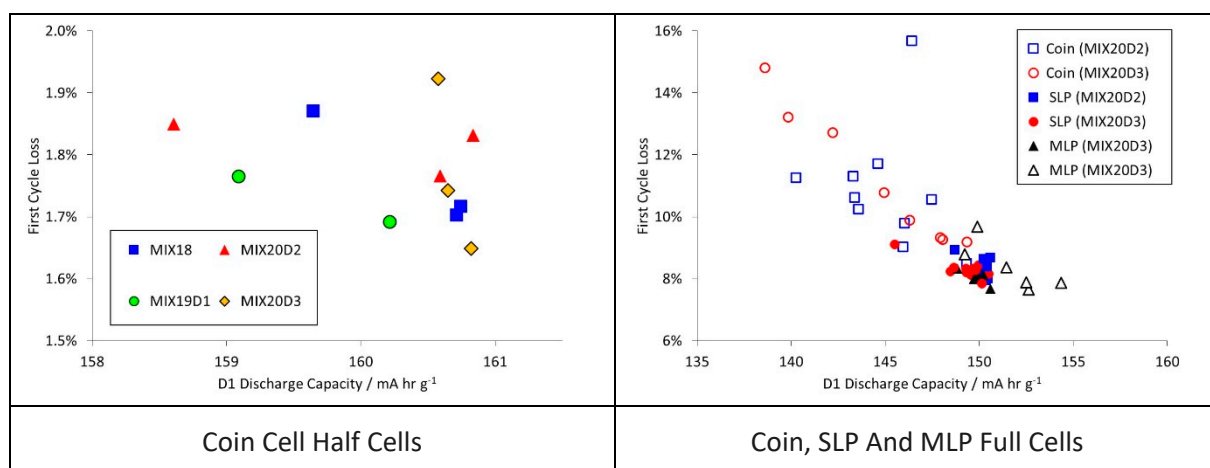

Figure S6. Results from formation cycles first cycle loss

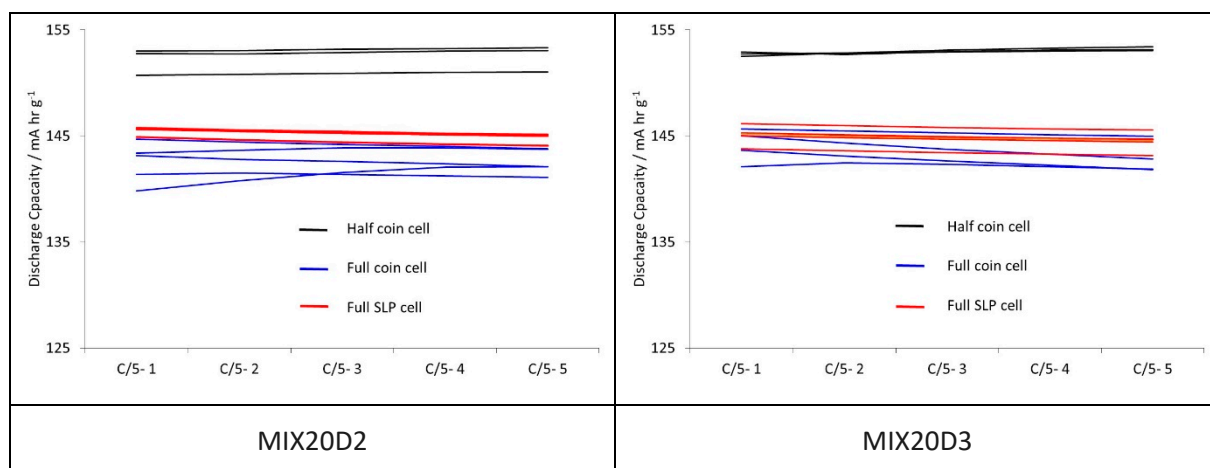

Figure S7. Coin capacities during conditioning cycles before rate tests

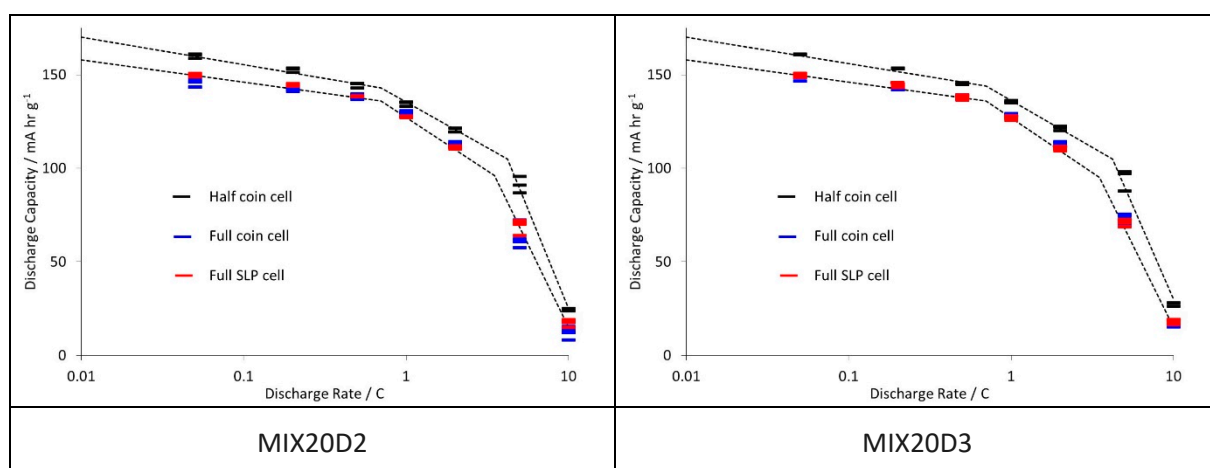

Figure S8. Comparison of rate test capacities in different cell formats

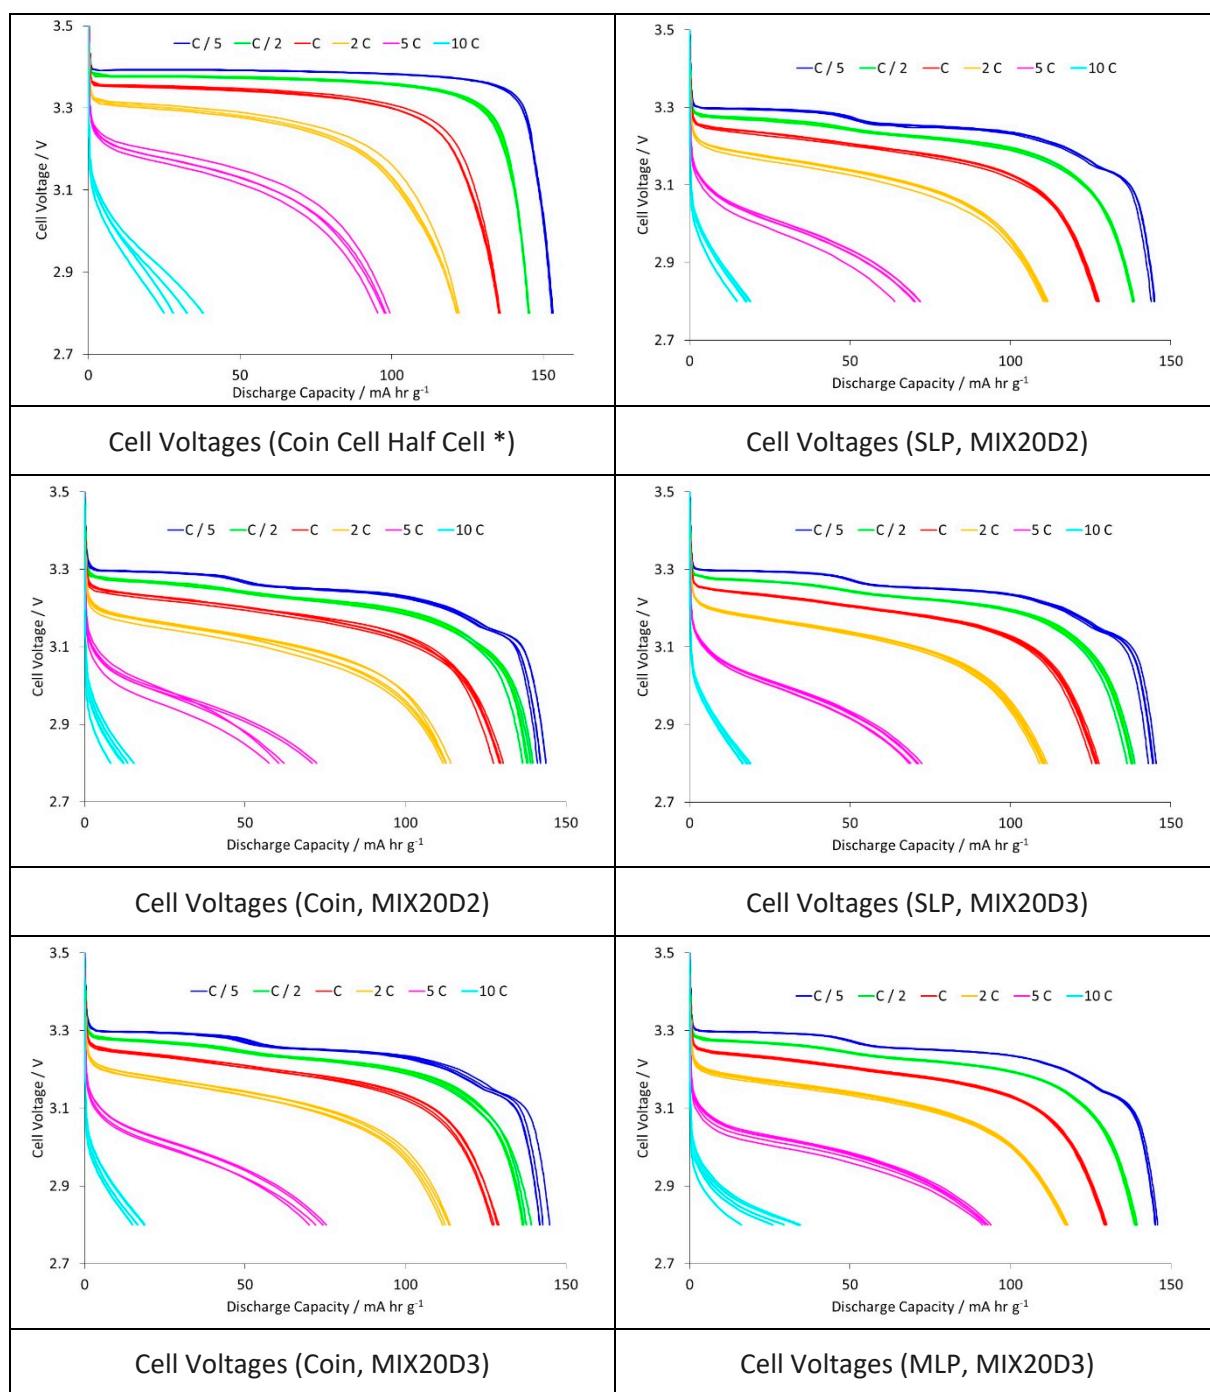

Figure S9. Cell voltages during rate tests

\* For the half-cell coin cells, the values shown are for the best cell from each coating.

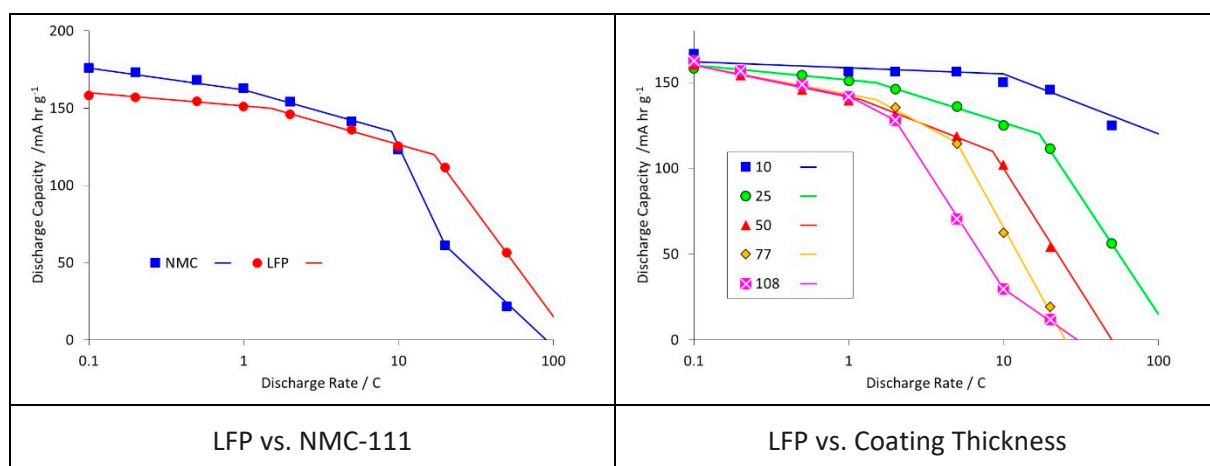

Figure S10. Published rate test results (Electrochim. Acta **71** (2012) p. 258)

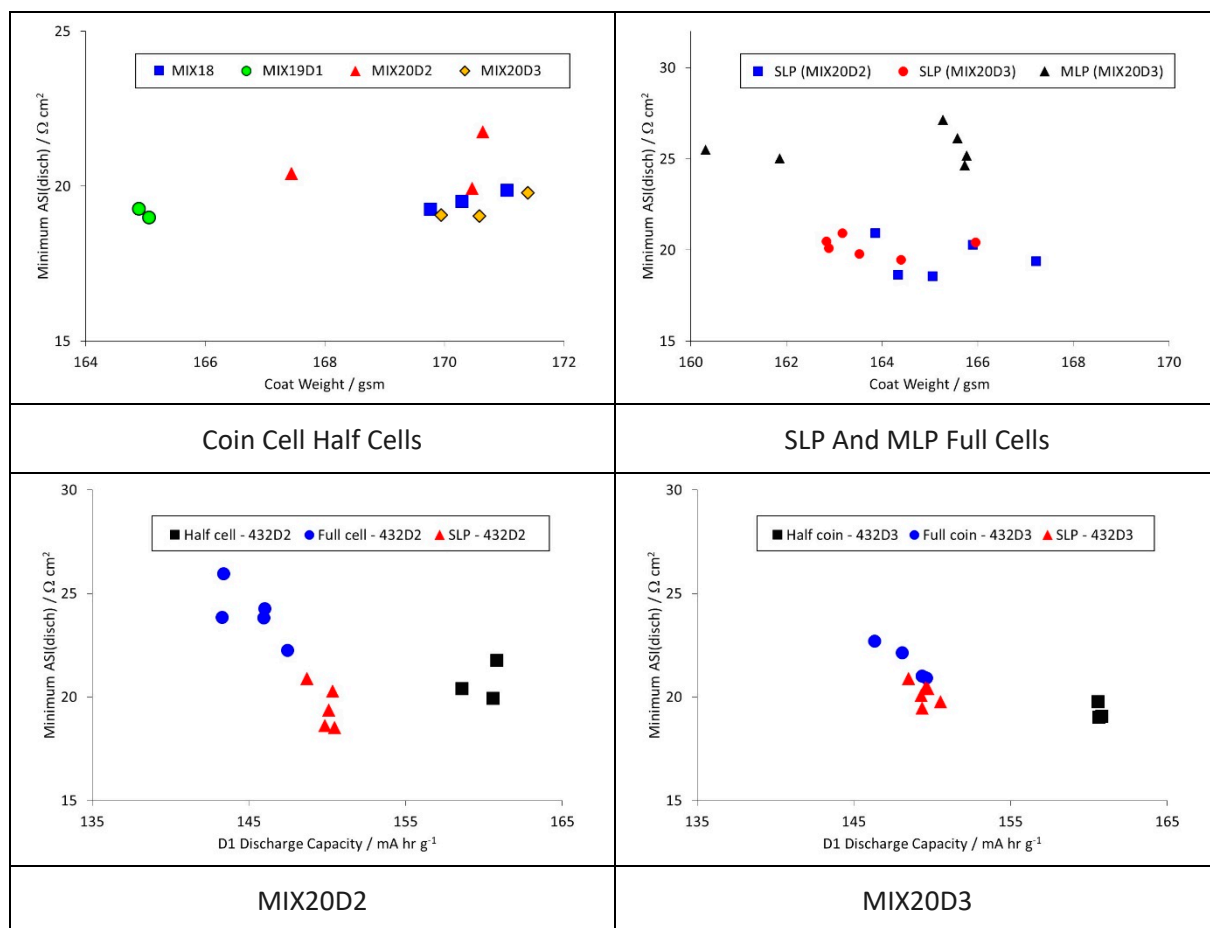

Figure S11. ASI measurements during discharge pulses



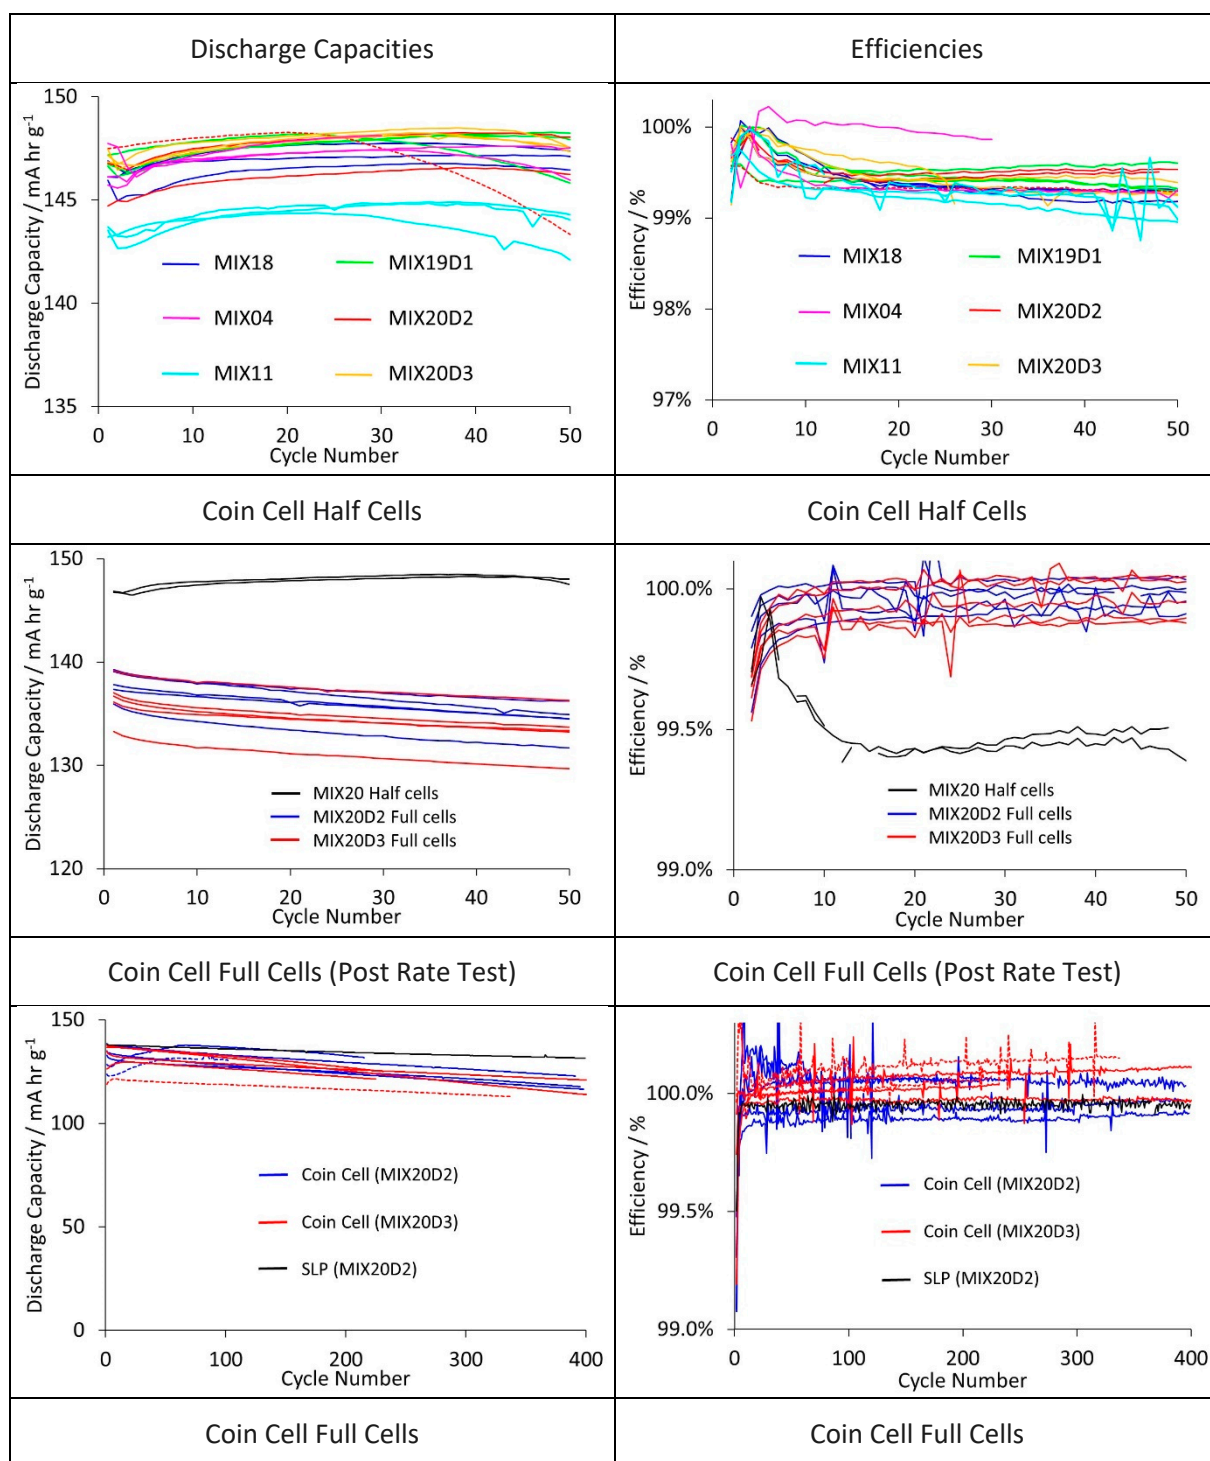

Figure S12. Discharge capacities and efficiencies during coin cell cycling tests  
(One SLP full cell is included, for comparative purposes)

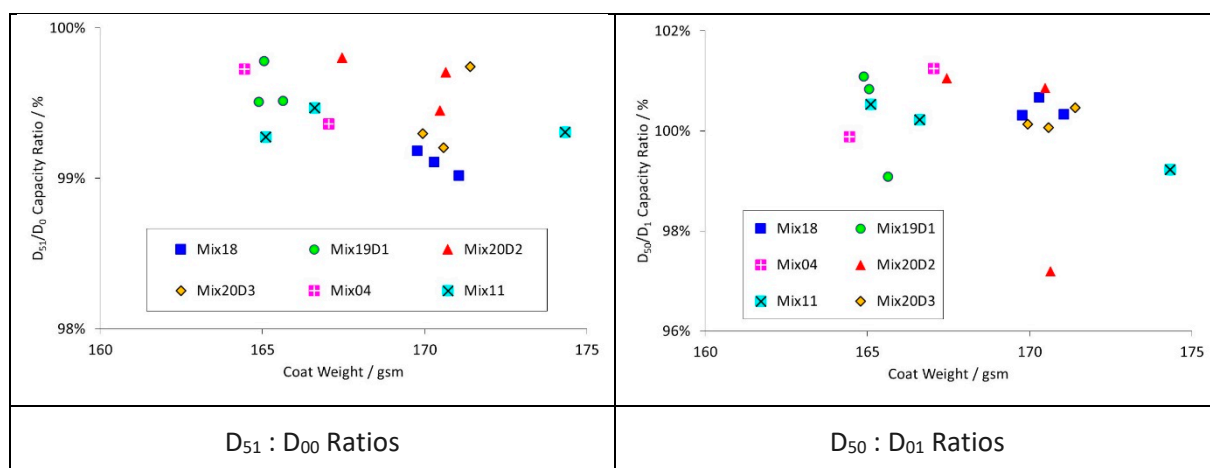

Figure S13. Capacity retention values for half-cell coin cell cycling tests

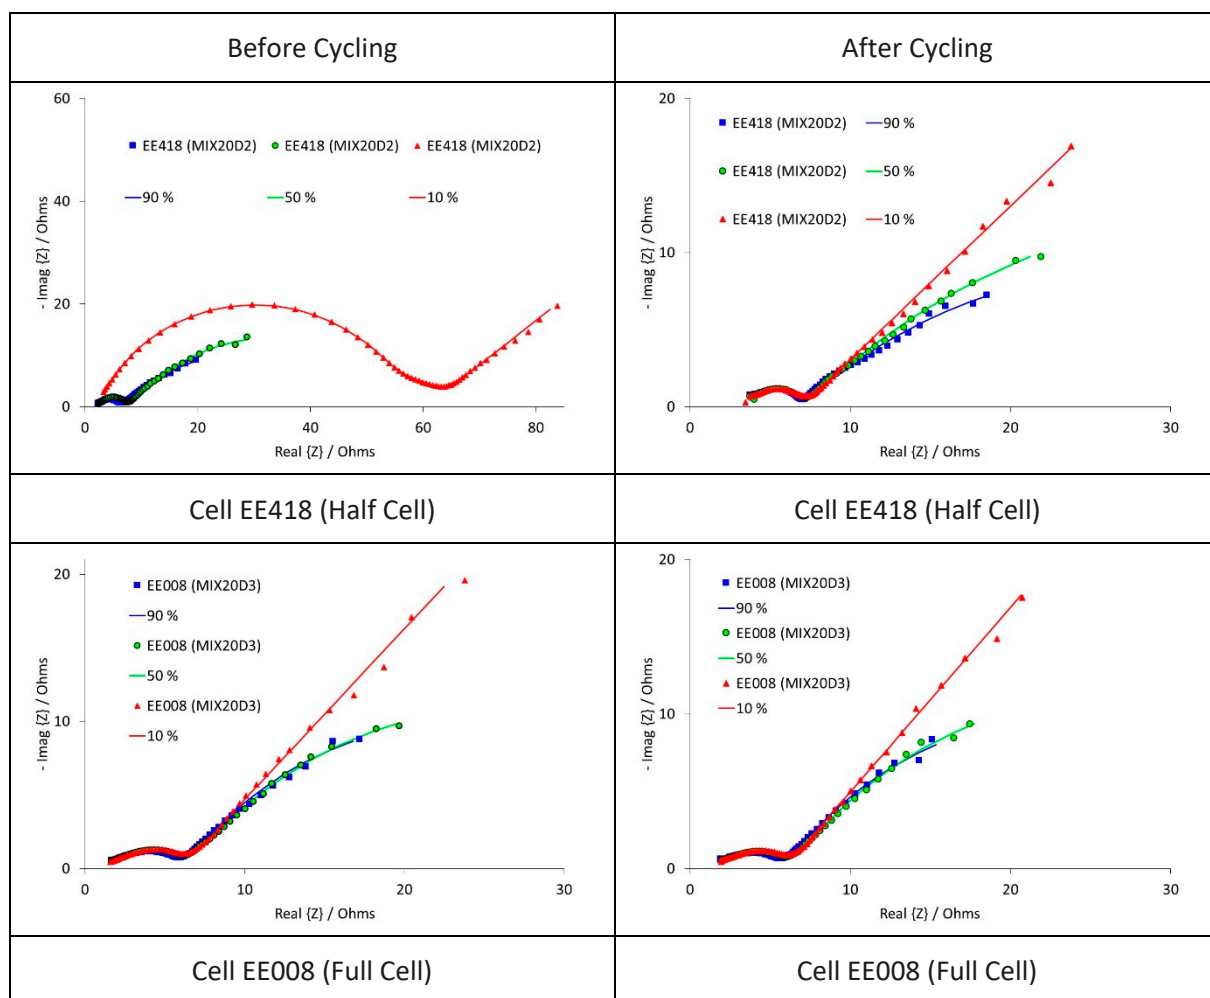

Figure S14. Impedance spectra for coin cells

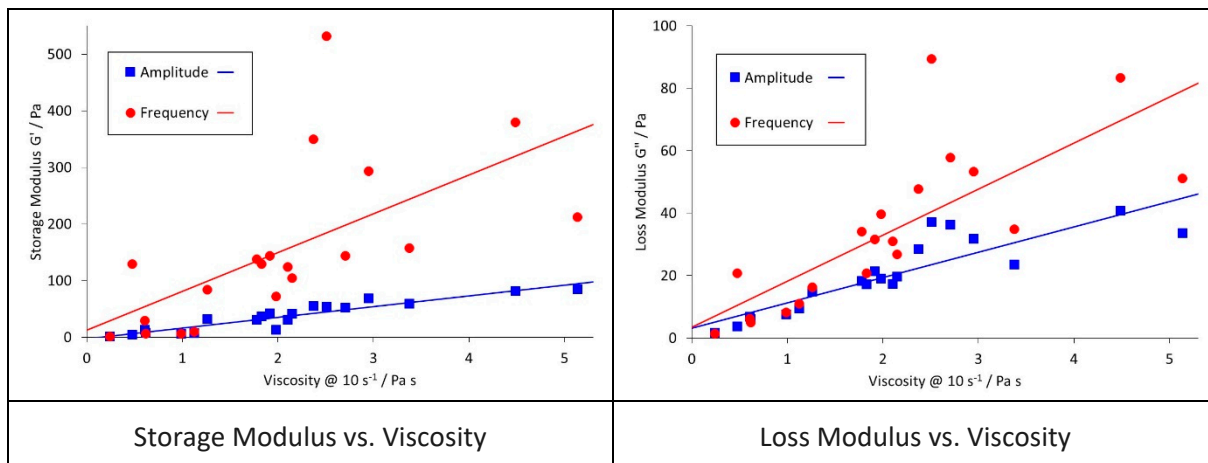

Figure S15. Viscosity measurement results (I)  
(Amplitude:  $G'$  and  $G''$  at 10 – 11 % strain, Frequency:  $G'$  and  $G''$  at 10  $\text{rad s}^{-1}$ , 0.1 % strain)

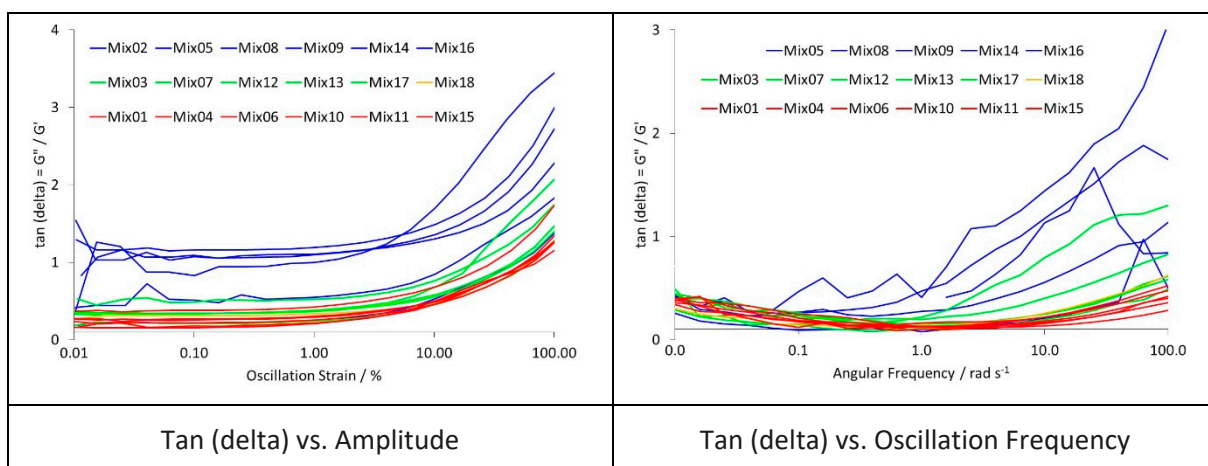

Figure S16. Viscosity measurement results (II)

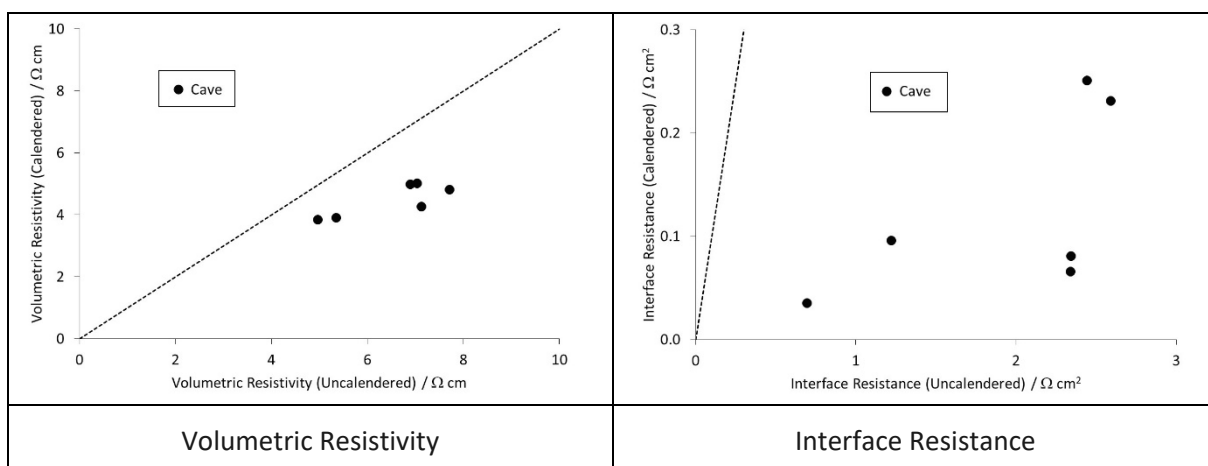

Figure S17. Comparison of resistance values before and after calendaring

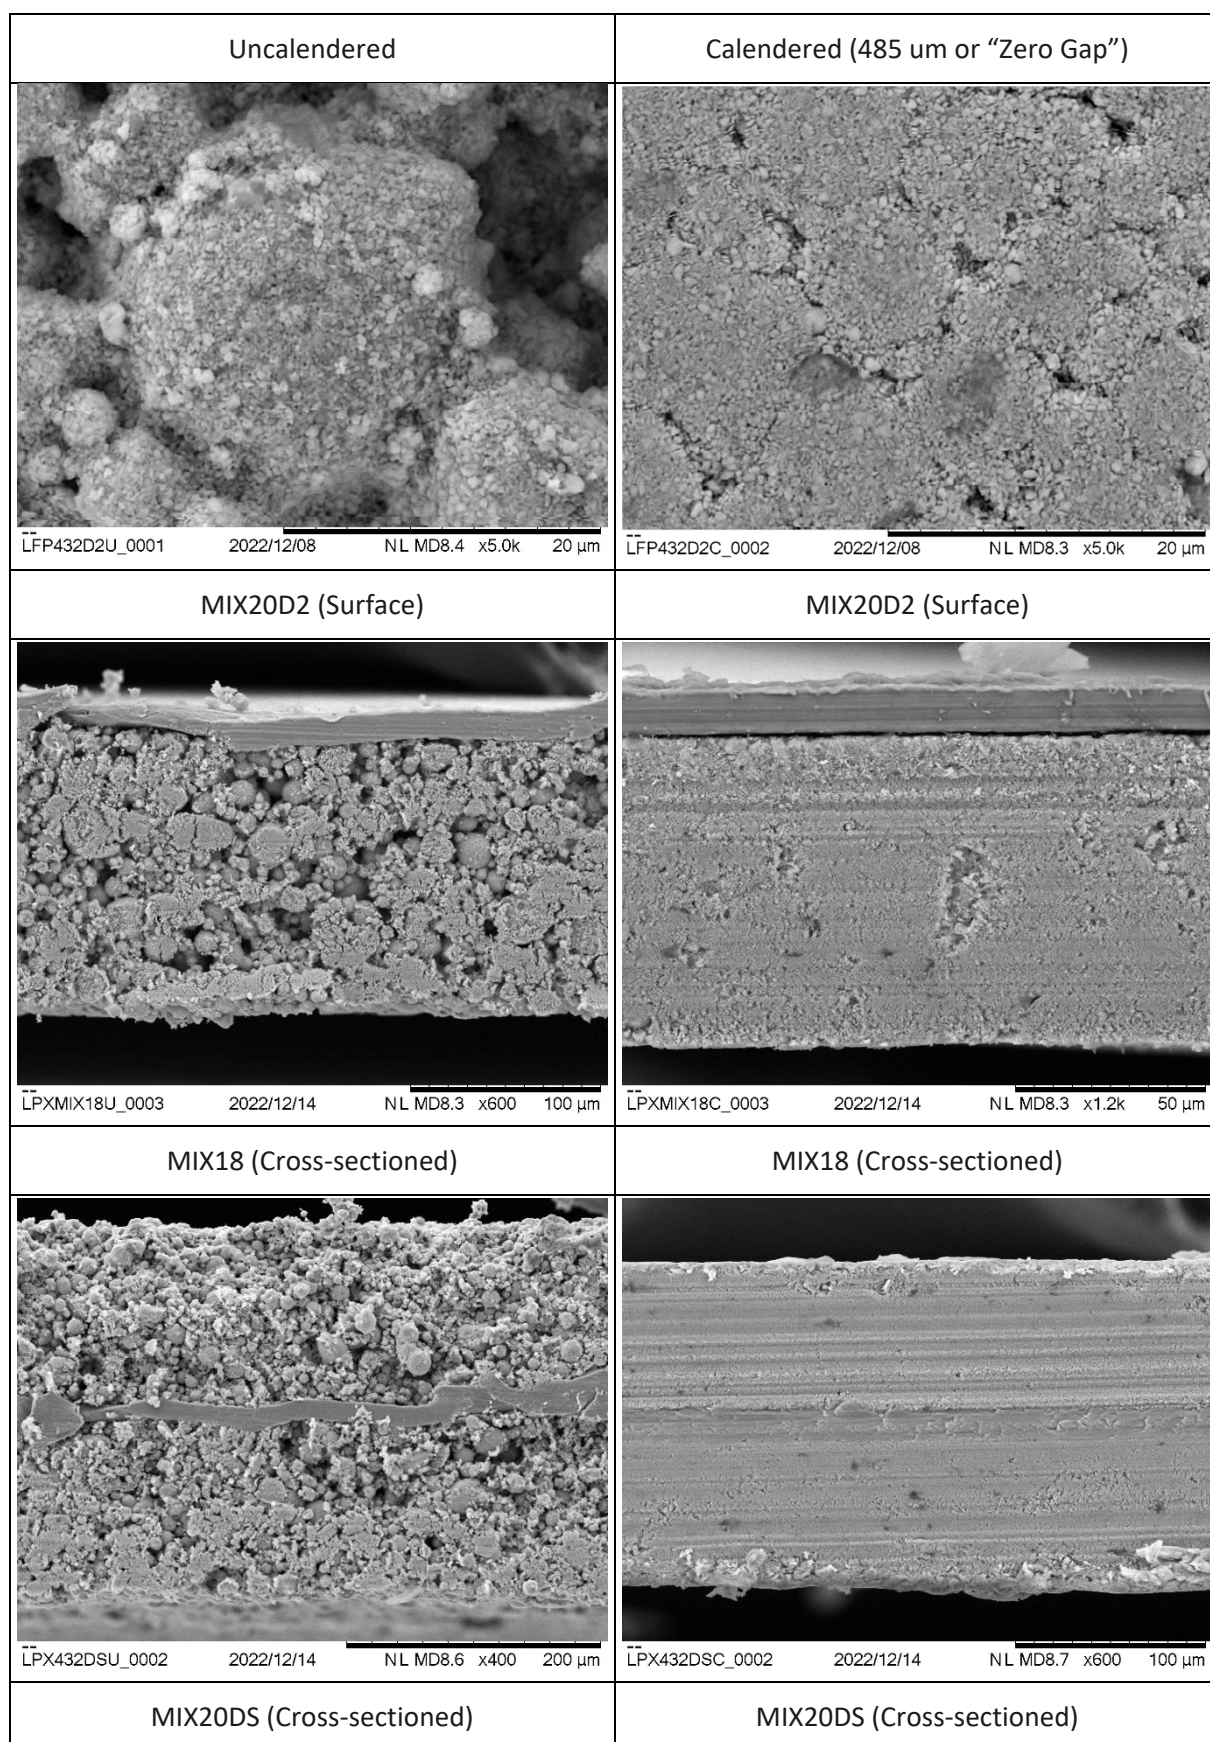

Figure S18. Selected SEM images of coatings
